# 1 Aging alters the role of basolateral amygdala in intertemporal choice

2  
3 Caesar M. Hernandez<sup>a</sup>, Caitlin A. Orsini<sup>b</sup>, Chase C. Labiste<sup>a</sup>, Alexa-Rae Wheeler<sup>a</sup>, Tyler W. Ten Eyck<sup>a</sup>,  
4 Matthew M. Bruner<sup>a</sup>, Todd J. Sahagian<sup>c</sup>, Scott W. Harden<sup>c</sup>, Charles J. Frazier<sup>c</sup>,  
5 Barry Setlow<sup>b</sup>, Jennifer L. Bizon<sup>a</sup>

6  
7 <sup>a</sup>Department of Neuroscience, University of Florida, Gainesville, FL 32610, USA

8 <sup>b</sup>Department of Psychiatry, University of Florida, Gainesville, FL 32610, USA

9 <sup>c</sup>Department of Pharmacodynamics, University of Florida, Gainesville, FL 32610, USA

10  
11 **Correspondence:** Jennifer L. Bizon, Ph.D.  
12 Department of Neuroscience  
13 University of Florida  
14 PO Box 100244  
15 Gainesville, FL 32610-0244  
16 bizonj@ufl.edu  
17 (352) 294-5149

## 18 Acknowledgements.

19 We thank Vicky S. Kelly, Shannon C. Wall, and Bonnie I. McLaurin for technical assistance. Supported by  
20 R01AG029421 and the McKnight Brain Research Foundation (JLB), RF1AG060778 (JLB, BS, CJF), a McKnight  
21 Predoctoral Fellowship and the Pat Tillman Foundation (CMH), and a Thomas H. Maren Fellowship and  
22 K99DA041493 (CAO).

## 23 Disclosures.

24 The authors have no conflicts of interest.  
25  
26

## 27 **Abstract**

28 Aging is associated with an increased ability to delay gratification. Moreover, even when matched for  
29 performance, young and aged subjects recruit distinct brain circuitry to complete complex cognitive tasks.  
30 Experiments herein used an optogenetic approach to test whether altered recruitment of the basolateral  
31 amygdala (BLA), a brain region implicated in valuation of reward-cost contingencies, contributes to age-  
32 dependent changes in intertemporal decision making. BLA inactivation while rats deliberated prior to choices  
33 between options that yielded either small, immediate or large, delayed rewards rendered both young and aged  
34 rats less impulsive. In contrast, BLA inactivation after choices were made (during evaluation of choice outcomes)  
35 rendered young rats more impulsive but had no effect in aged rats. These data define multiple, temporally-  
36 discrete roles for BLA circuits in intertemporal decision making and implicate altered recruitment of BLA in the  
37 elevated preference for delayed rewards that is characteristic of advanced age.

38

39

## 40 **Keywords**

41 aging, basolateral amygdala, optogenetics, decision making, delay discounting, impulsive choice

42

## 43 **Abbreviations**

44 basolateral amygdala (BLA); Fischer 344 x Brown Norway hybrid (FBN); intertrial interval (ITI)

45

46 **Impact Statement**

47 Basolateral amygdala (BLA) performs multiple, temporally-discrete functions during intertemporal decision  
48 making. Differential engagement of BLA contributes to the enhanced ability to delay gratification that is  
49 characteristic of advanced ages.

50

## 51 Introduction

52 Intertemporal choice refers to decisions between rewards that differ with respect to both their magnitude  
53 and how far in the future they will arrive. Biases in intertemporal choice, whether manifesting as extreme  
54 impulsivity or patience, strongly associate with psychiatric disease. For example, greater preference for smaller,  
55 immediate rewards (greater impulsive choice) is a hallmark of attention deficit hyperactivity disorder and  
56 substance use disorders (Bickel et al., 2014; Hamilton et al., 2015; Patros et al., 2016; Crowley et al., 2017),  
57 whereas a pronounced preference for delayed gratification is characteristic of the eating disorder anorexia  
58 nervosa (Steinglass et al., 2012; Kaye et al., 2013; Decker et al., 2015). Independent of psychopathology,  
59 decision making associates with life outcomes and changes across the lifespan (Denburg et al., 2007; Boyle et  
60 al., 2012; Beas et al., 2015; Hess et al. 2015). Contrary to economic models predicting that older individuals  
61 should account for reduced time on the horizon in making intertemporal choices, healthy older adults actually  
62 exhibit a marked increase in preference for delayed outcomes (Green et al., 1996, 1999; Jimura et al., 2011;  
63 Löckenhoff et al., 2011; Mata et al., 2011; Samanez-Larkin et al., 2011; Eppinger et al., 2012). Although this  
64 pattern of choice behavior is sometimes characterized as “wisdom”, increased preference for delayed over  
65 immediate rewards may also be maladaptive. For example, biases toward delayed gratification in older adults  
66 could contribute to inappropriately conservative financial strategies that forgo expenditures necessary to  
67 maintain quality of life.

68 The neural circuits underlying age-associated changes in intertemporal choice remain poorly understood.  
69 Relevant to elucidating this circuitry is the fact that intertemporal choice is a multicomponent process that  
70 involves a series of temporally distinct cognitive operations (Rangel et al., 2008; Fobbs and Mizumori, 2017).  
71 Specifically, most decisions begin with representations of past choices, as well as some idea of the outcomes  
72 associated with each choice option. These representations are weighted by one’s motivation to obtain the choice  
73 outcomes at the time of the decision. A second phase of decision making occurs after a choice is made and  
74 involves evaluating the outcome to determine the degree to which it matches its predicted value. Feedback from  
75 this evaluative process can be used to adjust representations of the options to guide future choices. Both  
76 deliberation before a choice and outcome evaluation after a choice are supported by a network of brain structures  
77 that mediate reward processing, prospection, planning, prediction error, and value computations (Peters and

78 Büchel, 2011; Orsini et al., 2015a; Bailey et al., 2016; Fobbs and Mizumori, 2017). The basolateral amygdala  
79 (BLA), which forms associations between cues or actions and their outcomes (Johansen et al., 2012; Wassum  
80 and Izquierdo, 2015), plays a central role in decision making and has been specifically implicated in both  
81 deliberation and outcome evaluation (Schoenbaum et al., 1998, 1999; Ghods-Sharifi et al., 2009; Peters and  
82 Büchel, 2011; Zuo et al., 2011; Grabenhorst et al., 2012; Zangemeister et al., 2016; Orsini et al., 2017). The BLA  
83 undergoes structural and functional alterations with advanced age, and BLA activity during intertemporal decision  
84 making is attenuated in aged rats (Lolova and Davidoff, 1991; Rubinow and Juraska, 2009; Rubinow et al., 2009;  
85 Roesch et al., 2012; Burke et al., 2014; Prager et al., 2016; Samson et al., 2017). It remains unclear, however,  
86 how age-associated changes in BLA neurobiology impact intertemporal choice.

87 Optogenetic tools have been employed previously to define temporally-specific roles of BLA during  
88 deliberation and outcome evaluation in young rats performing a decision-making task involving risk of  
89 punishment. Specifically, BLA inactivation at temporally discrete timepoints in the decision process shifted choice  
90 behavior in opposite directions (Orsini et al., 2017), highlighting multiple roles for BLA processing in risky decision  
91 making. The present study used a similar *in vivo* optogenetic approach to both define the role of BLA neural  
92 activity in intertemporal choice, and further to determine if the roles of BLA change across the lifespan.

## 94 **Materials and Methods**

### 95 *Subjects*

96 Young (6 months old, n=22) and aged (24 months old, n=18) male Fischer 344 x Brown Norway F1 hybrid  
97 (FBN) rats were obtained from the National Institute on Aging colony (Charles River Laboratories) and  
98 individually housed in the Association for Assessment and Accreditation of Laboratory Animal Care International-  
99 accredited vivarium facility in the McKnight Brain Institute building at the University of Florida in accordance with  
100 the rules and regulations of the University of Florida Institutional Animal Care and Use Committee and National  
101 Institutes of Health guidelines. The facility was maintained at a consistent temperature of 25° with a 12-hour  
102 light/dark cycle (lights on at 0600) and free access to food and water except as otherwise noted. Rats were  
103 acclimated in this facility and handled for at least one week prior to initiation of any procedures. Rat numbers

104 reflect final group sizes after exclusion of misplaced injections. A subset of rats completed only some of the  
105 behavioral epochs due to lost headcaps and premature death, and some rats were excluded entirely for  
106 misplaced injections. Only the final numbers of rats included in each analysis is provided below.

### 107 *Surgical Procedures*

108 Surgical procedures were performed as in our previous work (Orsini et al., 2017). Rats were anesthetized  
109 with isoflurane gas (1-5% in O<sub>2</sub>) and secured in a stereotaxic frame (David Kopf). An incision along the midline  
110 over the skull was made and the skin was retracted. Bilateral burr holes were drilled above the BLA and five  
111 additional burr holes were drilled to fit stainless steel anchoring screws. Bilateral guide cannulae (22-gauge,  
112 Plastics One) were implanted to target the BLA (anteroposterior (AP): -3.25 mm from bregma, mediolateral (ML):  
113  $\pm 4.95$  mm from bregma, dorsoventral (DV): -7.3 mm from the skull surface) and secured to the skull using dental  
114 cement. A total of 0.6  $\mu$ L of a  $3.5 \times 10^{12}$  vg/ml titer solution (University of North Carolina Vector Core) containing  
115 AAV5 packaged with either halorhodopsin (CamKII $\alpha$ -eNpHR3.0-mCherry, n=8 young and n=7 aged rats) or  
116 mCherry alone (CamKII $\alpha$ -mCherry, n=4 young and n=4 aged rats) was delivered through the implanted cannulae  
117 at a rate of 0.6  $\mu$ L per min per side. Stainless steel obturators were placed into the cannulae to minimize the  
118 risk of infection. Immediately after surgery, rats received subcutaneous injections of buprenorphine (1 mg/kg)  
119 and meloxicam (2 mg/kg). Buprenorphine was also administered 24 hours post-operation, and meloxicam 48-  
120 72 hours post-operation. A topical ointment was applied as needed to facilitate wound healing. Sutures were  
121 removed after 10-14 days and rats recovered for at least 2 weeks before food restriction and behavioral testing  
122 began.

### 123 *In Vitro Electrophysiology*

124 For *in vitro* electrophysiological verification of functional halorhodopsin (eNpHR3.0), young (n=2) and  
125 aged (n=2) rats underwent surgery as described above except that neither guide cannulae nor skull screws were  
126 implanted. Following a one month survival, rats were deeply anesthetized via i.p. injection of ketamine (75–100  
127 mg/kg) and xylazine (5–10 mg/kg). The brain was rapidly cooled via transcardial perfusion with cold oxygenated  
128 sucrose-laden artificial cerebrospinal fluid (ACSF) containing (in mM): 205 sucrose, 10 dextrose, 1 MgSO<sub>4</sub>, 2  
129 KCl, 1.25 NaH<sub>2</sub>PO<sub>4</sub>, 1 CaCl<sub>2</sub>, and 25 NaHCO<sub>3</sub>. Rats were then decapitated, brains extracted and coronal slices

(300  $\mu\text{m}$ ) prepared using a Leica VT 1000s vibratome. Slices were incubated for 30 min at 37°C in oxygenated low-calcium ACSF containing (in mM): 124 NaCl, 10 dextrose, 3  $\text{MgSO}_4$ , 2.5 KCl, 1.23  $\text{NaH}_2\text{PO}_4$ , 1  $\text{CaCl}_2$ , and 25  $\text{NaHCO}_3$ , after which they were transferred to room temperature for a minimum of 30 min prior to experimentation. During recording experiments, slices were bathed in ACSF containing (in mM): 125 NaCl, 11 dextrose, 1.5  $\text{MgSO}_4$ , 3 KCl, 1.2  $\text{NaH}_2\text{PO}_4$ , 2.4  $\text{CaCl}_2$ , and 25  $\text{NaHCO}_3$ , maintained at 28-30°C. The pipette (internal) solution contained (in mM): 125 K-gluconate, 10 phosphocreatine, 1  $\text{MgCl}_2$ , 10 HEPES, 0.1 EGTA, 2  $\text{Na}_2\text{ATP}$ , 0.25  $\text{Na}_3\text{GTP}$ , and 5 biocytin, adjusted to pH 7.25 and 295 mOsm with KOH. BLA neurons were visualized using a combination of IR-DIC and epifluorescence microscopy using an Olympus BX51WI microscope and a TTL-controlled light source (X-Cite 110 LED light source, XF102-2 filter set, Omega Optical, excitation 540-580 nm, emission 615-695 nm, also used for *in vitro* activation of eNpHR3.0). Patch pipettes were prepared with a Flaming/Brown type pipette puller (Sutter Instrument, P-97) from 1.5 mm/0.8 mm borosilicate glass capillaries (Sutter Instruments) and pulled to an open tip resistance of 4–7 M $\Omega$  using internal solution and ACSF noted above. Electrophysiological recordings were performed using a Mutliclamp 700B amplifier and Digidata 1440A digitizer (Axon Instruments/Molecular Devices). Electrophysiological data were collected at 20 kHz and low-pass filtered at 2 kHz. Data analysis was performed using OriginLab and custom electrophysiology analysis software written by CJF.

Functionality of eNpHR3.0 was assessed in current-clamp configuration. Current was continuously delivered through the patch pipette to induce steady firing (1-10 Hz), and a 500 ms pulse of light was delivered through the objective lens to activate eNpHR3.0. At the conclusion of experiments, slices were transferred to 10% formalin (4°C, 24 hr) to allow for *post hoc* histological analysis. Slices were washed in PBS, permeabilized in PBS containing 0.1% Triton-X, and incubated in streptavidin conjugate with fluorophore (1:1000, 594 nm, ThermoFisher S32356). Slices were then mounted onto slides and coverslipped using VECTASHIELD. Morphological reconstruction was achieved by creating an all-in-focus maximum intensity projection of a Z-series acquired with a two-photon laser scanning epifluorescence microscope (810 nm excitation).

155 *Behavioral Testing Procedures*

156 **Apparatus.** Testing was conducted in 4 identical standard rat behavioral test chambers (Coulbourn Instruments)  
157 with metal front and back walls, transparent Plexiglas side walls, and a floor composed of steel rods (0.4 cm in  
158 diameter) spaced 1.1 cm apart. Each test chamber was housed in a sound-attenuating cubicle and was equipped  
159 with a custom food pellet delivery trough fitted with a photobeam head entry detector (TAMIC Instruments)  
160 located 2 cm above the floor and extending 3 cm into the chamber in the center of the front wall. A nosepoke  
161 hole equipped with a 1.12 W lamp for illumination was located directly above the food trough. Food rewards  
162 consisted of 45-mg grain-based food pellets (PJAI; Test Diet, Richmond, IN, USA). Two retractable levers were  
163 positioned to the left and right of the food trough (11 cm above the floor). A 1.12 W house light was mounted  
164 near the top of the rear wall of the sound-attenuating cubicle. For optical activation of eNpHR3.0, laser light (561  
165 nm, 8–10 mW output at the fiber tip, Shanghai Laser & Optics Century) was delivered through a patch cord (200  
166  $\mu$ m core, Thor Labs) to a rotary joint (1 X 2, 200  $\mu$ m core, Doric Lenses) mounted above the operant chamber.  
167 At the rotary joint, the light source was split into 2 outputs. Tethers (200  $\mu$ m core, 0.22 NA, Thor Labs) connected  
168 these outputs to the bilateral optic fibers (200  $\mu$ m core, 0.22 NA, 8.3 mm in length; Precision Fiber Products)  
169 implanted in the BLA (Orsini et al., 2017). A computer running Graphic State 4.0 software (Coulbourn  
170 Instruments) was used to control the behavioral apparatus and laser delivery, and to collect data.

171 **Behavioral shaping and initial training.** The intertemporal choice task was based on a design by Evenden  
172 and Ryan (1996) and was used previously to demonstrate age-related alterations in decision making in both  
173 Fischer 344 (Simon et al., 2010) and FBN (Hernandez et al., 2017) rats (Figure 1). Rats were initially shaped to  
174 lever press to initiate delivery of a food pellet into the food trough and were then trained to nosepoke to initiate  
175 lever extension. Each nosepoke initiated extension of either the left or right lever (randomized across pairs of  
176 trials), a press on which yielded a single food pellet. After two consecutive days of reaching criterion performance  
177 (45 presses on each lever), rats began testing on the intertemporal choice task.

178 **Intertemporal choice task.** Each 60-min session consisted of 3 blocks of 20 trials each. The trials were 60 s in  
179 duration and began with a 10 s illumination of both the nosepoke port and house light. A nosepoke into the port  
180 during this time extinguished the nosepoke light and triggered lever extension. Any trials on which rats failed to  
181 nosepoke during this 10 s window were scored as omissions. Each 20-trial block began with 2 forced choice



182 trials, in which either the right or left lever was extended, in order to remind rats of the delay contingencies in  
183 effect for that block. These forced choice trials were followed by 18 free choice trials, in which both levers were  
184 extended. For all trials, one lever (either left or right, counterbalanced across age groups) was always associated  
185 with immediate delivery of one food pellet (the small reward), and the other lever was associated with 3 food  
186 pellets (the large reward) delivered after a variable delay. Lever assignment (small or large reward) remained  
187 constant throughout testing. Within a session, the duration of the delay preceding large reward delivery increased  
188 across the three blocks of trials. The actual delay durations were adjusted individually for each rat on a daily  
189 basis, such that the percent choice of the large reward for each rat corresponded to approximately 100% in block  
190 1, 66% in block 2, and 33% in block 3. On all trials, rats were given 10 s to press a lever, after which the levers  
191 were retracted, and food was delivered into the food through. If rats failed to press a lever within 10 s, the levers  
192 were retracted, lights were extinguished, and the trial was scored as an omission. An inter-trial interval (ITI)  
193 followed either food delivery or an omitted trial, after which the next trial began.

194 Rats were initially trained for 15 sessions on the intertemporal choice task. They were then lightly  
195 anesthetized and optic fibers (Thor Labs) were inserted into the guide cannulae such that they extended 1 mm  
196 past the end of the guide cannulae, and then were cemented in place. After recovery, rats resumed training but  
197 were now tethered to the rotary joint.

198 ***Effects of optogenetic inhibition during specific task epochs.*** The effects of temporally-discrete optogenetic  
199 inhibition of BLA were tested in both young and aged rats using a within-subjects design. Data from sessions  
200 occurring just prior to inactivation sessions (in which rats did not receive light delivery) were used as the baseline  
201 against which to compare the effects of BLA inhibition. Task epochs in which the BLA was inactivated included:  
202 *deliberation* [light delivery began 500 ms prior to illumination of the nosepoke light and continued until the rat  
203 pressed the lever (maximum of 10 s)]; *small reward delivery* [light delivery began when food was dispensed and  
204 remained on for 4 s]; *large reward delivery* [light delivery began when food was dispensed and remained on for  
205 4 s], *delay* [light delivery began upon pressing the large reward lever and remained on throughout the delay (2-  
206 24s)]; *large reward delivery + delay* [light delivery began upon large reward choice and remained on until 4 s  
207 after the large reward was dispensed], *intertrial interval (ITI)*, [light delivery began 14 seconds after reward was

208 dispensed and continued for 4 s]. Finally, the that the order in which the BLA was inactivated during different  
209 task epochs was randomized and counterbalanced across the two age groups.

### 210 *Vector Expression and Cannula Placement Histology*

211 After completion of behavioral testing, rats were administered a lethal dose of Euthasol (sodium  
212 pentobarbital and phenytoin solution; Virbac, Fort Worth, TX, USA) and perfused transcardially with a 4°C  
213 solution of 0.1M phosphate buffered saline (PBS), followed by 4% (w/v) paraformaldehyde in 0.1M PBS. Brains  
214 were removed and post-fixed for 24 hours then transferred to a 20% (w/v) sucrose solution in 0.1M PBS for 72  
215 hours (all chemicals purchased from Fisher Scientific, Hampton, NH, USA). Brains were sectioned at 35 µm  
216 using a cryostat maintained at -20°C. Sections were rinsed in 0.1M TBS and incubated in blocking solution  
217 consisting of 3% normal goat serum, 0.3% Triton-X-100 in 0.1M TBS for 1 hour at room temperature. Sections  
218 were then incubated with rabbit anti-mCherry antibody (ab167453) diluted in blocking solution at a dilution of  
219 1:1000 (72 hours, 4°C). Following primary incubation, sections were rinsed in 0.1M TBS and incubated in  
220 blocking solution containing the secondary antibody (donkey anti-rabbit conjugated to AlexaFluor-488, 1:300) for  
221 2 hours at room temperature. After rinsing in 0.1M TBS, sections were mounted on electrostatic glass slides and  
222 coverslipped using Prolong Gold containing DAPI (Thermo Fisher Scientific, Waltham, MA, USA). Slides were  
223 sealed with clear nail polish and sections were visualized at 20X using an Axio Imager 2 microscopy system  
224 (Carl Zeiss Microscopy, LLC, Thornwood, NY, USA) to assess mCherry expression in BLA neurons. Cannula  
225 placements and mCherry expression were mapped using a rat brain atlas (Paxinos and Watson, 2005).  
226 Decisions regarding inclusion/exclusion of rats based on cannula placements and mCherry expression within  
227 the BLA were conducted by an observer for whom rats' behavioral performance was masked.

### 228 229 *Experimental Design and Statistical Analysis*

230 ***Evaluation of age differences in intertemporal choice under baseline conditions.*** Raw data files were  
231 extracted using a Graphic State 4.0 analysis template that was custom-designed to extract the number of lever  
232 presses on each lever (large or small rewards) during forced and free choice trials in each trial block. First, age  
233 differences in intertemporal choice performance were tested by analyzing the actual delays used to achieve the  
234 target 100%, 66% and 33% choice of the large reward in blocks 1, 2 and 3, respectively. Actual delays were

235 compared using a mixed-factor ANOVA, with age (2 levels: young and aged) as the between-subjects factor and  
236 block (3 levels: blocks 1-3) as the within-subjects factor. Second, the *choice indifference point*, or the delay at  
237 which a rat showed equivalent choice of the small and large reward, was calculated and compared between  
238 young and aged rats. Choice indifference points were calculated by fitting a trendline to each rat's percent choice  
239 of the large reward at each delay block. The slope-intercept formula,  $y=mx+b$  (where "y" is percent choice or the  
240 large reward, and "x" is delay), was then used to solve for the number of seconds (x) at which  $y=50\%$  choice of  
241 the large reward (the delay at which the rat was equally likely to choose the large or small reward). Choice  
242 indifference points were compared between young and aged rats using an independent samples t-test. For all  
243 statistical analyses and reported results, alpha was set to 0.05,  $\eta^2$  and Cohen's *d* were used to report the effect  
244 size for mixed-factor ANOVAs and t-tests, respectively, and  $1-\beta$  was used to report the observed power.

245 ***Evaluation of BLA inactivation on intertemporal choice.*** Power analyses based on data from an initial cohort  
246 of rats ( $n=3$ ) were used to determine sample sizes necessary to evaluate the effects of BLA inactivation on  
247 choice behavior. These analyses indicated the presence of large effect sizes (greater than 1.0), and that  $n=6$   
248 rats should be sufficient to detect effects of BLA inactivation, with a power to detect significant differences of  
249 0.95. The effects of light delivery were tested separately for each task epoch (*deliberation, small reward delivery,*  
250 *large reward delivery, delay, delay + large reward delivery, and ITI*). For each of these task epochs, comparisons  
251 were made using a mixed factor ANOVA (age  $\times$  delay block  $\times$  inactivation condition), with age as the between-  
252 subjects factor (2 levels: young and aged), and delay block (3 levels: delay blocks 1-3) and inactivation condition  
253 (2 levels: laser on or off) as within-subjects factors. To better understand significant main effects or interactions,  
254 *post hoc* analyses were conducted in each age group separately using a repeated-measures ANOVA (block  $\times$   
255 inactivation condition). Note that for those epochs in which effects of BLA inhibition during the delay were tested,  
256 data analyses were confined to blocks 2 and 3 as no delay was used in block 1.

257 ***Evaluation of choice strategy resulting from BLA inactivation.*** Additional analyses were conducted to better  
258 elucidate the shifts in young rat choice performance following BLA inactivation during deliberation and small  
259 reward outcome. Graphic State 4.0 templates were created to assess trial-by-trial choices during baseline and  
260 BLA inactivation sessions for the deliberation and small reward epochs. Trials were categorized based on  
261 choices made on the previous trial. For the deliberation epoch, trials were categorized as "small-shift-to-large"

262 or “large-stay-on-large”. For the small reward delivery epoch, trials were categorized as “large-shift-to-small” or  
263 “small-stay-on-small”. The number of trials in each category was divided by the total number of trials in that  
264 session and expressed as a percentage. For each task epoch, percentages were compared using paired-  
265 samples t-tests comparing baseline and inactivation condition.

266 ***Effects on other task performance measures resulting from BLA inactivation.*** Other task measures were  
267 compared between BLA inactivation and baseline conditions in task epochs in which BLA inactivation produced  
268 significant changes in choice behavior. Specifically, on free choice trials, response latency (the time between  
269 lever extension and a lever press) was compared. Previous work shows that response latencies can differ for  
270 large and small reward levers (Hernandez et al., 2017) and hence analyses were conducted separately for each  
271 lever using data from delay block 2, during which rats made roughly equivalent numbers of choices on each  
272 reward lever. Response latency and total number of trials completed were compared using a mixed factor  
273 ANOVA (age × inactivation condition).

## 275 Results

### 276 *Electrophysiological confirmation of light-induced inhibition of BLA neurons expressing eNpHR3.0.*

277 Virally-transduced (mCherry-positive) neurons in the BLA were visualized and targeted for whole cell  
278 patch clamp recordings using a combination of epifluorescence and differential interference contrast microscopy  
279 (Figures 2A-C). Consistent with previously published work that employed identical methodology (Orsini et al.,  
280 2017), mCherry-positive neurons (n=9 young and n=7 aged) were robustly hyperpolarized in response to 500  
281 ms of light, and this hyperpolarization reliably eliminated action potential firing in cells (Figure 2D). *Post-hoc*  
282 morphological characterization confirmed that light-sensitive BLA neurons exhibited morphological  
283 characteristics consistent with pyramidal cells (i.e., large soma with numerous spiny dendritic arborizations,  
284 Figure 2C).

### 285 *Fiber placement and AAV transduction*

286 Expression of mCherry was used to confirm viral transduction in the BLA of rats used in behavioral studies  
287 that were injected with either AAV5-CamKII $\alpha$ -eNpHR3.0-mCherry (AAV-eNpHR3.0, black circles in Figure 3) or

288 AA5-CamKII $\alpha$ -mCherry alone (AAV-control, white circles in Figure 3). Cannula placements were centered in the  
289 BLA, and the brain volumes transduced by AAV-eNpHR3.0 and AAV-control (calculated from the atlas of Paxinos  
290 & Watson, 2005) were comparable in young and aged rats.

### 291 *Effect of age on intertemporal choice performance*

292 Previous work shows that aged rats display attenuated discounting of delayed rewards (Simon et al.,  
293 2010; Hernandez et al., 2017). Therefore, prior to inactivation sessions, delays were adjusted on an individual  
294 basis to ensure that all rats' choice performance was in the same parametric space (Figure 4A). This approach  
295 allowed a full and comparable range of effects from BLA inactivation to be observed in both young and aged  
296 rats, without concern for ceiling or floor effects. Figure 4B shows the actual delays used in the second and third  
297 blocks to achieve roughly 66% and 33% choice of the large reward, respectively, plotted as a function of age. A  
298 two-factor ANOVA (age  $\times$  block) used to compare the actual delays indicated the expected main effect of block  
299 ( $F_{(2,26)} = 18.685$ ,  $p < 0.001$ ,  $\eta^2 = 0.606$ ,  $1-\beta = 0.930$ ), as well as a main effect of age ( $F_{(1,13)} = 6.402$ ,  $p = 0.025$ ,  
300  $\eta^2 = 0.330$ ,  $1-\beta = 0.648$ ) and an age  $\times$  block interaction ( $F_{(2,26)} = 6.913$ ;  $p = 0.004$ ,  $\eta^2 = 0.347$ ,  $1-\beta = 0.891$ ). *Post hoc*  
301 analyses comparing the actual delays of young and aged rats in blocks 2 and 3 indicated that aged rats required  
302 longer delays than young to achieve comparable preference for large vs. small rewards (Block 2:  $t_{(13)} = -2.234$ ,  
303  $p = 0.044$ , Cohen's  $d = 1.114$ ,  $1-\beta = 0.480$ ; Block 3:  $t_{(13)} = -2.660$ ,  $p = 0.020$ , Cohen's  $d = 1.328$ ,  $1-\beta = 0.625$ ). Consistent  
304 with this analysis, aged rats in comparison to young rats showed a greater indifference point (the delay at which  
305 rats showed equivalent preference for large and small rewards;  $t_{(13)} = -2.168$ ,  $p = 0.049$ , Cohen's  $d = 1.080$ ,  $1-$   
306  $\beta = 0.457$ ; Figure 4C).

### 307 *Effects of BLA Inactivation on choice behavior during deliberation*

308 Inactivation of the BLA during the deliberation epoch ( $n = 8$  young and  $n = 7$  aged) significantly increased  
309 choice of the large reward to the same extent in young and aged rats, particularly at long delays (Figure 5A). A  
310 three-factor ANOVA (laser condition  $\times$  age  $\times$  delay block) indicated a main effect of laser condition  
311 ( $F_{(1,13)} = 103.507$ ,  $p < 0.001$ ,  $\eta^2 = 0.888$ ,  $1-\beta = 1.000$ ) but no main effect of age ( $F_{(1,13)} = 0.089$ ,  $p = 0.770$ ,  $\eta^2 = 0.007$ ,  $1-$   
312  $\beta = 0.059$ ) nor an age  $\times$  laser condition interaction ( $F_{(1,13)} = 1.838$ ,  $p = 0.198$ ,  $\eta^2 = 0.124$ ,  $1-\beta = 0.242$ ). A reliable main  
313 effect of delay block was observed ( $F_{(2,26)} = 112.005$ ,  $p < 0.001$ ,  $\eta^2 = 0.896$ ,  $1-\beta = 1.000$ ), as was as an interaction  
314 between laser condition and delay block ( $F_{(2,26)} = 38.369$ ,  $p < 0.001$ ,  $\eta^2 = 0.747$ ,  $1-\beta = 1.000$ ). Follow-up analyses,

315 conducted to further explore the laser condition  $\times$  delay block interaction, compared the effects of inactivation at  
316 each block. These analyses indicated that BLA inactivation significantly increased choice of the large reward in  
317 Blocks 2 ( $t_{(14)}=-6.494$ ,  $p<0.001$ , Cohen's  $d=1.724$ ,  $1-\beta=0.995$ ) and 3 ( $t_{(14)}=-9.434$ ,  $p<0.001$ , Cohen's  $d=2.228$ ,  $1-$   
318  $\beta=1.000$ ), but not in Block 1 in which rats of both ages strongly preferred the large reward, even under control  
319 conditions ( $t_{(14)}=-0.323$ ,  $p=0.751$ , Cohen's  $d=0.124$ ,  $1-\beta=0.051$ ).

### 320 *Effects of BLA inactivation on choice behavior during the small reward*

321 In direct contrast to the effects of BLA inactivation during deliberation, BLA inactivation during the small  
322 reward epoch ( $n=6$  young and  $n=6$  aged) significantly decreased choice of the large reward in young rats (Figure  
323 5B). A three-factor ANOVA (laser condition  $\times$  age  $\times$  delay block) indicated main effects of laser condition  
324 ( $F_{(1,10)}=5.131$ ,  $p=0.047$ ,  $\eta^2=0.339$ ,  $1-\beta=0.534$ ) and delay block ( $F_{(2,20)}=248.854$ ,  $p<0.001$ ,  $\eta^2=0.961$ ,  $1-\beta=1.000$ ),  
325 but no interaction between laser condition and delay block ( $F_{(2,20)}=1.317$ ;  $p=0.290$ ,  $\eta^2=0.116$ ,  $1-\beta=0.251$ ).  
326 Notably, although there was no main effect of age ( $F_{(1,10)}=0.941$ ;  $p=0.355$ ,  $\eta^2=0.086$ ,  $1-\beta=0.142$ ), the effects of  
327 BLA inactivation during small reward delivery did reliably interact with age (age  $\times$  inactivation condition:  
328  $F_{(1,10)}=7.127$ ,  $p=0.024$ ,  $\eta^2=0.416$ ,  $1-\beta=0.673$ ). To better define the nature of this interaction, two factor ANOVAs  
329 (laser condition  $\times$  delay block) were performed separately on choice behavior in young and aged rats. BLA  
330 inactivation significantly decreased choice of the large reward in young rats (main effect of laser condition:  
331  $F_{(1,5)}=18.226$ ;  $p=0.008$ ,  $\eta^2=0.785$ ,  $1-\beta=0.922$ , main effect of delay block:  $F_{(2,10)}=173.588$ ,  $p<0.001$ ,  $\eta^2=0.972$ ,  $1-$   
332  $\beta=1.000$ ; laser condition  $\times$  delay block:  $F_{(2,10)}=3.829$ ,  $p=0.058$ ,  $\eta^2=0.434$ ,  $1-\beta=0.556$ ) but not in aged rats (main  
333 effect of laser condition:  $F_{(1,5)}=0.061$ ;  $p=0.814$ ,  $\eta^2=0.012$ ,  $1-\beta=0.055$ ; main effect of delay block:  $F_{(2,10)}=93.015$ ,  
334  $p<0.001$ ,  $\eta^2=0.949$ ,  $1-\beta=1.000$ ; laser condition  $\times$  delay block:  $F_{(2,10)}=0.185$ ,  $p=0.834$ ,  $\eta^2=0.036$ ,  $1-\beta=0.072$ ).

### 335 *Altered choice strategy resulting from BLA inactivation during the deliberation and small reward epochs*

336 The data above show that BLA inactivation in young rats during the deliberation and small reward epochs  
337 altered choice behavior in opposite directions (i.e., BLA inactivation during deliberation *increased* whereas BLA  
338 inactivation during small reward outcome *decreased* choice of the large, delayed reward). A trial-by-trial analysis  
339 was conducted on these data to determine the effects of BLA inactivation on two distinct behavioral strategies  
340 that could mediate these shifts in choice preference. Specifically, during the deliberation epoch, this analysis  
341 determined the degree to which BLA inactivation influenced rats to “shift” to the large reward option following a



342 choice of the small reward on the previous trial, versus “stay” with the large reward option following a choice of  
343 large reward on the previous trial. In the small reward outcome epoch, the analysis assessed the degree to which  
344 BLA inactivation influenced rats to “shift” to the small reward option following a choice of the large reward on a  
345 previous trial, versus “stay” with the small reward option following a choice of the small reward on the previous  
346 trial.

347 As shown in Figure 5C, the percentage of trials during deliberation epoch inactivation on which a large  
348 reward choice was followed by a second large reward choice (large-stay) did not differ as a function of laser  
349 condition ( $t_{(7)}=-1.299$ ,  $p=0.235$ , Cohen’s  $d=0.618$ ,  $1-\beta=0.208$ ). In contrast, a similar analysis conducted on the  
350 percentage of trials on which a choice of the small reward was followed by choice of the large reward (small-  
351 shift) revealed a main effect of laser condition ( $t_{(7)}=-4.095$ ,  $p=0.005$ , Cohen’s  $d=1.802$ ,  $1-\beta=0.917$ ). This finding  
352 indicates that the effects on choice behavior of BLA inactivation during deliberation result from rats shifting  
353 choices toward the large reward following a choice of the small reward. Applying a parallel analysis to sessions  
354 in which inactivation took place during the small reward epoch yielded a different pattern of results. BLA  
355 inactivation during the small reward epoch significantly increased the percentage of trials on which a small reward  
356 choice was followed by a second small reward choice (small-stay;  $t_{(5)}=-3.593$ ,  $p=0.016$ , Cohen’s  $d=1.694$ ,  $1-$   
357  $\beta=0.754$ ). In contrast, BLA inactivation did not affect the percentage of trials on which a choice of the large reward  
358 was followed by a choice of the small reward (large-shift;  $t_{(5)}=0.770$ ,  $p=0.476$ , Cohen’s  $d=0.399$ ,  $1-\beta=0.091$ ).

#### 359 *Effects of BLA inactivation on other task performance measures during inactivation during the deliberation and* 360 *small reward epochs*

361 Other task-specific measures were compared between BLA inactivation and baseline conditions in both  
362 deliberation and small reward epochs. The number of trials completed did not differ as a function of laser  
363 condition or age in either epoch (see Table 1). Similarly, no differences in response latency were observed as a  
364 function BLA inactivation, age, or lever type in these epochs (See Table 2).

#### 365 *Effects of BLA inactivation during epochs associated with the large reward outcome*

366 Choosing the large reward lever resulted in a variable delay period that was followed by large (3 food  
367 pellets) reward delivery. The effects of BLA inactivation during the delay and large reward delivery epochs were

368 initially tested in separate sessions (n=6 young and n=6 aged). Subsequently, the effects of BLA inactivation  
369 across both the delay and large reward epochs were tested in a subset of these rats (n=3 young and n=3 aged).

370 **Effects of BLA inactivation during the delay epoch.** The effects of BLA inactivation during the delay epoch  
371 were tested in delay blocks 2 and 3 using a three-factor ANOVA (laser condition  $\times$  age  $\times$  block). As expected,  
372 there was a main effect of delay block ( $F_{(2,20)}=146.811$ ,  $p<0.001$ ,  $\eta^2=0.936$ ,  $1-\beta=1.000$ ) such that both young and  
373 aged rats decreased their choice of the large reward as the delay prior to the large reward increased (Figure  
374 6A). Compared to baseline, however, no reliable differences in choice behavior resulted from BLA inactivation  
375 during the delay epoch ( $F_{(1,10)}=0.005$ ,  $p=0.947$ ,  $\eta^2=0.000$ ,  $1-\beta=0.050$ ), nor was there an interaction between  
376 inactivation condition and delay block ( $F_{(2,20)}=0.002$ ,  $p=0.998$ ,  $\eta^2=0.000$ ,  $1-\beta=0.050$ ). Similarly, there were neither  
377 main effects nor interactions associated with age (main effect of age:  $F_{(1,10)}<0.001$ ,  $p=0.996$ ,  $\eta^2=0.000$ ,  $1-$   
378  $\beta=0.050$ ; age  $\times$  delay block:  $F_{(2,20)}=0.077$ ,  $p=0.926$ ,  $\eta^2=0.008$ ,  $1-\beta=0.060$ ; age  $\times$  laser condition:  $F_{(1,10)}=0.081$ ,  
379  $p=0.782$ ,  $\eta^2=0.008$ ,  $1-\beta=0.058$ ; age  $\times$  laser condition  $\times$  delay block:  $F_{(2,20)} = 0.096$ ,  $p=0.908$ ,  $\eta^2=0.010$ ,  $1-\beta=0.063$ ).

380 **Effects of BLA inactivation during the large reward epoch.** Unlike the effects of BLA inactivation during the  
381 small reward epoch, inactivation of BLA during the large reward epoch did not alter choice performance in either  
382 young or aged rats compared to baseline (Figure 6B). As expected, there was a main effect of delay block ( $F_{(2,20)}=$   
383  $120.846$ ,  $p<0.001$ ,  $\eta^2=0.924$ ,  $1-\beta=1.000$ ) such that both young and aged rats decreased their choice of the large  
384 reward as the delay to large reward delivery increased. Compared to baseline, however, no reliable differences  
385 in choice behavior resulted from BLA inactivation during the large reward epoch (main effect of laser condition:  
386  $F_{(1,10)}=0.125$ ,  $p=0.731$ ,  $\eta^2=0.012$ ,  $1-\beta=0.062$ ), nor was there an interaction between laser condition and delay  
387 block ( $F_{(2,20)}=0.133$ ,  $p=0.876$ ,  $\eta^2=0.013$ ,  $1-\beta=0.068$ ). Similarly, there were no main effects ( $F_{(1,10)}=0.249$ ,  $p=0.629$ ,  
388  $\eta^2=0.024$ ,  $1-\beta=0.074$ ) nor interactions associated with age (age  $\times$  delay block:  $F_{(2,20)}=0.437$ ,  $p=0.652$ ,  $\eta^2=0.042$ ,  
389  $1-\beta=0.111$ ; age  $\times$  laser condition:  $F_{(1,10)}=0.697$ ,  $p=0.423$ ,  $\eta^2=0.065$ ,  $1-\beta=0.118$ ; age  $\times$  laser condition  $\times$  delay  
390 block:  $F_{(2,20)}=0.664$ ,  $p=0.526$ ,  $\eta^2=0.062$ ,  $1-\beta=0.146$ ).

391 **Effects of BLA inactivation during both delay and large reward epochs.** One possible explanation for the  
392 null effects of BLA inactivation during either the delay or large reward epochs is that, given the role of the BLA  
393 in integration of rewards and costs, inactivation may only be effective when conducted during both of these



394 epochs. To evaluate this possibility, rats were tested while the BLA was inactivated during *both* the delay and  
395 large reward epochs. Continuous inactivation across both epochs yielded no effects on choice performance. As  
396 shown in Figure 6C, a three-factor ANOVA (laser condition  $\times$  age  $\times$  delay block) revealed the expected main  
397 effect of delay block ( $F_{(2,8)}=193.743$ ,  $p<0.001$ ,  $\eta^2=0.980$ ,  $1-\beta=1.000$ ) but no main effects or interactions with laser  
398 condition or age (main effect of laser condition:  $F_{(1,4)}=0.757$ ,  $p=0.433$ ,  $\eta^2=0.159$ ,  $1-\beta=0.105$ ; main effect of age:  
399  $F_{(1,4)}=0.306$ ,  $p=0.610$ ,  $\eta^2=0.071$ ,  $1-\beta=0.072$ ; laser condition  $\times$  delay block:  $F_{(2,8)}=0.979$ ,  $p=0.417$ ,  $\eta^2=0.197$ ,  $1-$   
400  $\beta=0.165$ ; laser condition  $\times$  age:  $F_{(2,8)}=0.053$ ,  $p=0.949$ ,  $\eta^2=0.006$ ,  $1-\beta=0.052$ ; laser condition  $\times$  age  $\times$  delay block:  
401  $F_{(2,8)}=0.159$ ,  $p=0.856$ ,  $\eta^2=0.038$ ,  $1-\beta=0.067$ ).

#### 402 *Effects of BLA inactivation during the intertrial interval*

403 To confirm that BLA inactivation is not sufficient to produce effects on choice behavior in a non-  
404 temporally-specific manner, rats ( $n=6$  young,  $n=6$  aged) were tested while the BLA was inactivated during the  
405 intertrial interval (ITI). Although the expected main effect of delay block was observed ( $F_{(2,20)}=116.459$ ,  $p<0.001$ ,  
406  $\eta^2=0.921$ ,  $1-\beta=1.000$ ), BLA inactivation during the ITI did not alter choice performance compared to baseline in  
407 young or aged rats (main effect of laser condition:  $F_{(1,10)}=0.082$ ,  $p=0.780$ ,  $\eta^2=0.008$ ,  $1-\beta=0.058$ ; main effect of  
408 age:  $F_{(1,10)}=0.042$ ,  $p=0.842$ ,  $\eta^2=0.004$ ,  $1-\beta=0.054$ ; laser condition  $\times$  age:  $F_{(1,10)}=0.298$ ,  $p=0.597$ ,  $\eta^2=0.029$ ,  $1-$   
409  $\beta=0.079$ ; laser condition  $\times$  delay block:  $F_{(2,20)}=0.344$ ,  $p=0.713$ ,  $\eta^2=0.033$ ,  $1-\beta=0.097$ ; age  $\times$  delay block:  
410  $F_{(2,20)}=0.216$ ,  $p=0.808$ ,  $\eta^2=0.021$ ,  $1-\beta=0.079$ ; age  $\times$  laser condition  $\times$  delay block:  $F_{(2,20)}=0.198$ ;  $p=0.822$ ,  
411  $\eta^2=0.019$ ,  $1-\beta=0.077$ ; Figure 7).

#### 412 *Effects of light delivery into BLA in rats with control virus (AAV5-CamkII $\alpha$ -mCherry)*

413 To control for non-specific effects of light delivery (e.g., changes in tissue temperature), the effects of  
414 light delivery in rats transduced with a control virus that did not contain the eNpHR3.0 gene were tested during  
415 behavioral epochs in which BLA inactivation influenced choice behavior [i.e, deliberation ( $n=4$  young and  $n=4$   
416 aged rats) and small reward ( $n=4$  young rats)].

417 ***Effects of light delivery during the deliberation epoch.*** Light delivery during the deliberation epoch in rats  
418 transduced with a control virus had no effects on choice performance (Figure 8A). A three factor ANOVA (laser  
419 condition  $\times$  age  $\times$  delay block) indicated the expected main effect of delay block ( $F_{(2,12)}=100.272$ ;  $p<0.001$ ,

420  $\eta^2=0.944$ ,  $1-\beta=1.000$ ) but no main effects or interactions involving laser condition or age (main effect of laser  
421 condition:  $F_{(1,6)}=0.128$ ;  $p=0.733$ ,  $\eta^2=0.021$ ,  $1-\beta=0.061$ ; main effect of age:  $F_{(1,6)}=0.055$ ;  $p=0.823$ ,  $\eta^2=0.009$ ,  $1-$   
422  $\beta=0.055$ ; laser condition  $\times$  age:  $F_{(1,6)}=0.028$ ;  $p=0.874$ ,  $\eta^2=0.005$ ,  $1-\beta=0.052$ ; laser condition  $\times$  delay block:  
423  $F_{(2,12)}=0.121$ ;  $p=0.887$ ,  $\eta^2=0.020$ ,  $1-\beta=0.065$ ; age  $\times$  delay block:  $F_{(2,12)}=0.105$ ;  $p=0.902$ ; ,  $\eta^2=0.017$ ,  $1-\beta=0.063$   
424 laser condition  $\times$  age  $\times$  delay block:  $F_{(2,12)}=0.434$ ;  $p=0.658$ ,  $\eta^2=0.067$ ,  $1-\beta=0.105$ ).

425 ***Effects of light delivery during the small reward epoch.*** Light delivery during the small reward epoch in young  
426 rats transduced with control virus also failed to influence choice performance (Figure 8B). A two factor ANOVA  
427 (laser condition  $\times$  delay block) indicated the expected effect of delay block ( $F_{(2,6)}=46.712$ ;  $p<0.001$ ,  $\eta^2=0.940$ ,  $1-$   
428  $\beta=1.000$ ) but no main effect of laser condition ( $F_{(1,3)}=0.359$ ;  $p=0.592$ ,  $\eta^2=0.107$ ,  $1-\beta=0.072$ ) or laser condition  $\times$   
429 delay block interaction ( $F_{(2,6)}=0.173$ ;  $p=0.845$ ,  $\eta^2=0.055$ ,  $1-\beta=0.067$ ).

430

## 431 Discussion

### 432 *Age Differences in Intertemporal Choice*

433 Across species, aging is accompanied by increased preference for large, delayed over small, immediate  
434 rewards (Green et al., 1994, 1999; Simon et al., 2010; Jimura et al., 2011; Löckenhoff et al., 2011; Samanez-  
435 Larkin et al., 2011; Eppinger et al., 2012; Hernandez et al., 2017). Previous work from our labs showed that  
436 relative to young rats, aged rats display greater preference for large, delayed over small, immediate rewards in  
437 a “fixed delays, block design” intertemporal choice task. This difference is not readily attributable to age-related  
438 deficits in cognitive flexibility, working memory, or food motivation, nor is it attributable to impairments in reward  
439 or temporal discrimination (Simon et al., 2010; Hernandez et al., 2017). The present study replicated these prior  
440 findings using a task variant in which the fixed delays/block design used in our previous work was maintained,  
441 but the delays to large reward delivery were adjusted on an individual basis to obtain equivalent levels of choice  
442 preference in young and aged rats. Under these conditions, aged rats required longer delays to achieve levels  
443 of choice preference comparable to young, suggesting that delays are less effective at discounting reward value  
444 in aged compared to young rats. These data are consistent with findings in human subjects (Green et al., 1994,  
445 1999; Jimura et al., 2011; Eppinger et al., 2012) and indicate that an enhanced ability to delay gratification is a  
446 consistent feature of aging across species.

447 Data from the current study leveraged optogenetic approaches in young and aged rats to elucidate the  
448 contributions of BLA to intertemporal choice in young adult rats and to age-associated changes in this aspect of  
449 decision making. Temporally-discrete inactivation revealed distinct roles for BLA in intertemporal choice during  
450 the periods immediately before and after a choice was made. Specifically, BLA inactivation during the period  
451 prior to a choice (the deliberation epoch) increased choice of large, delayed over small, immediate rewards in  
452 both young and aged rats. In contrast, BLA inactivation during receipt of the small, immediate reward (after the  
453 choice) decreased choice of the large, delayed reward in young rats, whereas the same inactivation in aged rats  
454 had no effect on choice behavior. It should be noted that these results were not likely due to non-specific effects  
455 on behavior. Light delivery in rats expressing the control vector did not affect choice behavior, demonstrating  
456 that effects of BLA inactivation are due specifically to optogenetic rather than non-specific mechanisms. The fact  
457 that inactivation during the delay, large reward delivery, and ITI epochs had no effect on choice performance

458 lends further specificity to the effects of BLA inactivation. Moreover, there were no effects of BLA inactivation  
459 during either the deliberation or small reward epochs on the number of trials completed or response latencies.  
460 Finally, effects on choice performance were not driven by alterations in reward magnitude discrimination, as BLA  
461 inactivation during either the deliberation or small reward epochs did not alter choice performance under no  
462 delay conditions (Block 1). The fact that effects were observed only under conditions in which a cost  
463 accompanied the large reward (Blocks 2 and 3) suggests a role for the BLA in assigning value to rewards based  
464 on cost parameters. Considered together, these data indicate that BLA activity is engaged in different roles at  
465 distinct points in the decision process, and that these roles change across the lifespan.

#### 467 *BLA and Reward Outcome Evaluation*

468 BLA inactivation during the small reward epoch decreased choice of large, delayed rewards in young  
469 rats, concurrent with a selective increase in repetitive choices of small, immediate rewards on the trial-by-trial  
470 analysis. This pattern of results, which is similar to that induced by less temporally-specific approaches to  
471 inhibiting BLA activity, suggests that BLA inactivation causes a failure to acquire or integrate information about  
472 the negative properties of the small reward (i.e., that it is smaller than the large reward), rendering rats more  
473 likely to choose this option on subsequent trials. This idea is consistent with a large literature supporting a critical  
474 role for BLA in behavior directed by reward value (i.e., behavior that is sensitive to shifts in reward value; Hatfield  
475 et al., 1996; Málková et al., 1997; Baxter et al., 2000; Shiflett and Balleine, 2010; Izquierdo et al., 2013; Parkes  
476 and Balleine, 2013). Moreover, these results are consistent with the effects of BLA inactivation during receipt of  
477 a large, punished reward in a risky decision making task. Inactivation of the BLA caused an increase in choice  
478 of this option, suggesting that under normal circumstances, this structure processes information about the  
479 negative qualities of outcomes to bias future behavior toward more favorable options (Orsini et al., 2017).

480 The finding that BLA inactivation during the small reward epoch (which decreased choice of large,  
481 delayed rewards in young rats) had no effect in aged rats indicates that aging is associated with a reduced role  
482 for BLA in reward outcome evaluation. Importantly, this lack of effect in aged rats was likely not due to age-  
483 related impairments in viral transduction or optogenetic efficacy, as BLA inactivation during the deliberation

484 epoch in these same aged rats produced effects on behavior that were as robust as in young rats. In addition,  
485 because delays were adjusted to equate baseline performance in young and aged rats, the lack of effect in aged  
486 rats cannot be attributed to insufficient parametric space. Instead, the body of data in the current study support  
487 the idea of multiple BLA circuits that play unique roles in intertemporal decision making, and indicate that these  
488 circuits are differentially recruited in aged subjects. BLA neurons respond differentially to reward anticipation and  
489 specific outcomes (Schoenbaum et al., 1998; Belova et al., 2007, 2008; Sangha et al., 2013, 2013; Zhang et al.,  
490 2013; Beyeler et al., 2016), and distinct BLA efferents are thought to mediate encoding of appetitive vs. aversive  
491 stimuli (Beyeler et al., 2016; Burgos-Robles et al., 2017). Similar principles may operate in the context of  
492 intertemporal choice. Specifically, with respect to reward outcome evaluation, BLA projections to the nucleus  
493 accumbens (NAc) and other striatal regions may be particularly relevant. Pharmacological disconnection of the  
494 BLA and NAc impairs discrimination between a devalued vs. a non-devalued food reward (Shiflett and Balleine,  
495 2010), and a recent study in rats performing a probabilistic decision making task (choices between a small,  
496 guaranteed reward vs. a large, probabilistic reward) showed that optogenetic inactivation of BLA terminals in  
497 NAc during reward omission caused an increase in preference for this “risky” option (Bercovici et al., 2018).  
498 These results support the idea that during intertemporal choice, activity in a BLA-NAc circuit integrates  
499 information about reward outcomes in order to shift future decisions toward choice of options associated with  
500 larger but delayed rewards by using feedback about the value (or lack thereof) of the smaller, more immediate  
501 reward. Notably, Eppinger et al. (2013) showed blunted activity in ventral striatum during reward prediction errors  
502 in older adults performing a learning task. Moreover, with respect to BLA circuits, a recent study by Samson et  
503 al. (2017) reported enhanced  $\beta$ -power in BLA during evaluation of reward in a probabilistic decision making task,  
504 which may reflect restructuring of reward networks during aging. Indeed, in both humans and rats, there is  
505 substantial evidence for recruitment of brain circuits that are distinct from those engaged by young subjects  
506 performing complex cognitive operations, even when equated for performance (Antonenko and Flöel, 2014;  
507 Lighthall et al., 2014; Tomás-Pereira et al., 2015; Wang et al., 2015). It has further been suggested that in  
508 comparison to young, aged subjects use different information to make decisions, relying more heavily on  
509 compensatory cognitive strategies and differentially weighting rewards and costs (Löckenhoff et al., 2011; Mather

et al., 2012; Samanez-Larkin and Knutson, 2015; Pachur et al., 2017). These distinct cognitive strategies in older adults may minimize the role of reward outcome evaluation in guiding intertemporal choices.

### *BLA and Deliberation*

Unlike inactivation during outcome evaluation, optogenetic inhibition of BLA during deliberation in both young and aged rats closely mimicked the effects of age on intertemporal choice (i.e., increased choice of the large, delayed reward; Figure 4C and Simon et al., 2010; Hernandez et al., 2017). This role for the BLA in choice behavior is only observed using temporally-discrete optogenetic inhibition during deliberation, and not with experimental methods such as lesions or pharmacological inactivation that inhibit the BLA across all stages of the decision process and which produce opposite effects on choice behavior (i.e., decreased choice of large, delayed rewards; Winstanley et al., 2004; Churchwell et al., 2009). The fact that BLA circuits involved in reward outcome evaluation are not engaged in aged subjects thus may “unmask” the influence of a putative “BLA-deliberation” circuit on choice behavior. This pattern of results observed following BLA inactivation during deliberation in intertemporal choice is similar to those in a prior study from our labs which showed that BLA inactivation during the deliberation epoch in a risky decision making task decreased preference for risky rewards (Orsini et al., 2017). One interpretation of the finding that BLA activity during deliberation contributes to both impulsive and risky choices is that this activity is important for incentive motivation, driving individuals to seek more immediate rewards during intertemporal choices and larger, more salient rewards despite potential punishment during risky choices. This interpretation agrees with evidence from other behavioral contexts. For example, an intact BLA is necessary for the potentiating influence of reward-predictive cues on instrumental responding for reward (Everitt et al., 2003), as well as for maintenance of effortful choices of preferred options (Hart and Izquierdo, 2017). In addition, the trial-by-trial analysis of the current data indicates that BLA inactivation during deliberation increases the frequency with which rats shift from choosing the small, immediate to the large, delayed reward.

In addition to its projections to the NAc described above, the BLA projects to many other output structures (Sah et al., 2003), some of which may play a unique role in guiding intertemporal choices. In particular, BLA

536 projections to PFC may confer incentive information about potential outcomes prior to the choice (Pérez-Jaranay  
537 and Vives, 1991; St Onge and Floresco, 2010; Sripada et al., 2011; Dilgen et al., 2013; Kim et al., 2017). The  
538 existence of such a putative BLA-PFC “deliberation circuit” is supported by recent data showing that neural  
539 activity in PFC is preceded by activity in BLA in response to conditioned reward cues (Burgos-Robles et al.,  
540 2017). While under normal conditions, activity in BLA circuits involved in outcome evaluation may be the primary  
541 driver of choice behavior, the failure to engage such circuits in aging may shift the influence of BLA to those  
542 circuits engaged prior to a choice, during deliberation of the choice options. As such, structural or functional  
543 changes in BLA that occur with aging are likely to exert their influence on intertemporal choice through this  
544 putative “deliberation circuit”. Indeed, studies in humans and rodents have shown that neural activity in  
545 anticipation of both rewarding and aversive stimuli can be blunted in older subjects compared to young  
546 (Schoenbaum et al., 2006; Eppinger et al., 2015; Samanez-Larkin and Knutson, 2015). Further,  
547 electrophysiological data indicate that BLA activity, as assessed by baseline firing rate of BLA neurons *in vivo*,  
548 is reduced in aged rats (Roesch et al., 2012). These data, together with those in the current study, suggest that  
549 BLA circuits that normally encode the incentive value of rewards may be hypoactive in aging. In combination  
550 with a failure to engage BLA circuits during outcome evaluation, these effects of aging on BLA neurons may  
551 contribute to the attenuated impulsive choice observed in aging. Experiments focusing on specific molecular  
552 mechanisms underlying age differences in neural activity within discrete BLA circuits will be useful for elucidating  
553 the neural substrates that account for the increased ability of aged subjects to delay gratification. An increased  
554 appreciation of such mechanisms within the context of the nuanced roles of BLA across multiple stages of the  
555 decision process could reveal therapeutic targets for optimizing decision making in both older and younger  
556 adults.



## 558 Figure Captions

559 **Figure 1. Schematics of intertemporal choice task and timing of light delivery.** **A:** Schematic of the  
560 intertemporal choice task illustrating the choices and trial blocks across which the duration of the delay to the  
561 large reward increased. On each trial, rats were presented with two response levers that differed with respect to  
562 the magnitude and timing of associated reward delivery. Presses on one lever delivered a small (one food pellet),  
563 immediate reward, whereas presses on the other lever delivered a large (three food pellets), delayed reward.  
564 Trials were presented in a blocked design, such that the delay to the large reward increased across successive  
565 blocks of trials in a session. **B.** Schematic of a single trial in the intertemporal choice task, showing the task  
566 epochs during which light was delivered (represented by the green line). Using a within-subjects design, light  
567 was delivered during *deliberation* (when levers are presented until a choice is made); *small reward delivery*;  
568 *delay*; *large reward delivery*; *delay + large reward delivery*; and *intertrial interval (ITI)*.

569  
570 **Figure 2. Functional inhibition of BLA pyramidal neurons via activation of halorhodopsin in aged**  
571 **tissue.** **A.** CaMKII $\alpha$ -driven eNpHR3.0/mCherry was virally delivered into the BLA of young and aged rats. **B.**  
572 CamKII $\alpha$  neurons were targeted for study by their fluorescence using a combination of DIC (gray) and  
573 epifluorescence (magenta) microscopy. **C.** A two-photon reconstruction of a biocytin-filled eNpHR3.0-expressing  
574 BLA neuron demonstrates multiple primary dendritic branches and spiny dendritic arborizations typical of BLA  
575 pyramidal neurons. **D.** Representative current-clamp trace from an aged BLA neuron demonstrates that a brief  
576 pulse of green light reversibly hyperpolarizes the neuron to silence firing.

577  
578 **Figure 3. Verification of viral expression and fiber optic placements.** The extent of viral expression in young  
579 (left) and aged (right) rats is depicted in green. Darker green indicates areas of greater viral expression (epicenter  
580 of the BLA). Lighter green indicates less viral expression (margins of the BLA). Filled black circles represent  
581 optic fiber placements in the experimental groups, and open black circles represent optic fiber placements in the  
582 control groups. Viral expression and fiber placements are mapped to standardized coronal sections  
583 corresponding to -2.12 mm through -3.30 mm from bregma according to the atlas of Paxinos and Watson (2005).



584

585 **Figure 4. A:** Mean percent choice of the large reward in young and aged rats prior to initiation of any BLA  
586 inactivation experiments. Note that delays to large reward delivery were adjusted individually for young (n=8,  
587 open circles) and aged (n=7, closed circles) rats in order to place all rats in the same parametric space. **B:** Mean  
588 actual delays required to achieve the comparable young and aged rat choice performance shown in panel A.  
589 Aged rats required longer delays in Blocks 2 and 3 to achieve choice performance comparable to young rats. **C:**  
590 The mean indifference point (the delay at which rats showed equivalent preference for the small and large  
591 rewards) was significantly greater in aged rats compared to young. In all panels, error bars represent the  
592 standard error of the mean (SEM). \*p<0.05, main effect of age; \*\*p<0.01, age × delay block interaction.

593

594 **Figure 5. Effect of BLA inactivation during the deliberation and small reward epochs. A:** Inactivation of  
595 the BLA during the deliberation epoch (prior to a choice) resulted in a significant increase in preference for the  
596 large, delayed reward in both young (n=8) and aged (n=7) rats. **B:** Inactivation of the BLA during the small reward  
597 epoch resulted in a significant decrease in preference for the large, delayed reward in young (n=6), but not aged  
598 (n=6), rats (\*\*p<0.01, main effect of inactivation). **C:** Effects of BLA inactivation on trial-by-trial choice strategies  
599 in young rats. This analysis revealed that the increased choice of the large, delayed reward caused by BLA  
600 inactivation during deliberation in young rats (panel A) was due to an increase in the percentage of trials on  
601 which rats shifted to the large, delayed reward following a choice of the small, immediate reward. A similar  
602 analysis revealed that the decreased choice of the large, delayed reward caused by BLA inactivation during the  
603 small, immediate reward in young rats (panel B) was due to an increase in the percentage of trials on which rats  
604 “stayed” on the small, immediate reward following a choice of this reward on the previous trial. In all panels, error  
605 bars represent standard error of the mean (SEM). \*p<.05, \*\*p<0.01, \*\*\*p<0.001, main effect of inactivation;  
606 \*\*\*p<0.001, inactivation × delay block interaction.

607

608 **Figure 6. Effect of BLA inactivation during outcomes associated with choice of the large reward. A:**  
609 Inactivation of the BLA during the delay epoch resulted in no change in choice performance in either young (n=6)

610 or aged (n=6) rats. **B:** Inactivation of the BLA during the large reward epoch resulted in no change in choice  
611 performance in either young (n=6) or aged (n=6) rats. **C:** Inactivation of the BLA during both the delay and large  
612 reward epochs resulted in no change in choice performance in either young (n=3) or aged (n=3) rats. Error bars  
613 represent standard error of the mean (SEM).

614  
615 **Figure 7. Effect of BLA inactivation during the intertrial interval.** Inactivation of the BLA during the intertrial  
616 interval resulted in no change in choice performance in either young (n=6) or aged (n=6) rats. Error bars  
617 represent standard error of the mean (SEM).

618  
619 **Figure 8. Effect of light delivery into BLA during the deliberation and small reward e in rats transduced**  
620 **with a control vector. A:** Light delivery into the BLA during the deliberation epoch resulted in no change in  
621 choice performance in either young (n=4) or aged (n=4) control vector rats. **C:** Light delivery into the BLA during  
622 the small reward epoch resulted in no change in choice performance in young (n=4) control vector rats. Error  
623 bars represent standard error of the mean (SEM).

626 **Table Captions**

627 **Table 1. Effects of BLA inactivation on number of trials completed.** There were no effects of BLA inactivation  
628 during either the deliberation epoch ( $F_{S(1,13)}=0.162-3.264$ ;  $ps=0.094-0.694$ ) or the small reward epoch  
629 ( $F_{S(1,10)}=0.180-3.431$ ;  $ps=0.094-0.681$ ).

| Decision Making Period | Age   | Inactivation Condition | Mean   | Std. Error | N |
|------------------------|-------|------------------------|--------|------------|---|
| Deliberation           | Young | Baseline               | 52.688 | 0.81       | 8 |
|                        |       | Inactivation           | 51.625 | 0.94       | 8 |
|                        | Aged  | Baseline               | 51.714 | 0.87       | 7 |
|                        |       | Inactivation           | 53.429 | 1.003      | 7 |
| Small Reward Outcome   | Young | Baseline               | 52.667 | 0.394      | 6 |
|                        |       | Inactivation           | 53.667 | 0.635      | 6 |
|                        | Aged  | Baseline               | 52.639 | 0.394      | 6 |
|                        |       | Inactivation           | 53.167 | 0.635      | 6 |

630

631

632 **Table 2. Effects of BLA inactivation on lever response latencies.** There were no effects of BLA inactivation  
 633 during either the deliberation epoch (Large reward lever:  $F_{S(1, 13)}=0.588-2.898$ ,  $ps=0.112-0.457$ ; Small reward  
 634 lever:  $F_{S(1, 8)}=0.505-2.050$ ,  $ps=0.190-0.497$ ) or the small reward epoch (Large reward lever:  $F_{S(1, 10)}=0.257-4.149$ ,  
 635  $ps=0.069-0.623$ ; Small reward lever:  $F_{S(1, 10)}=0.004-3.225$ ,  $ps=0.103-0.954$ ).

636

| Decision Making Period | Age   | Lever | Inactivation Condition | Mean (sec) | Std. Error | N |
|------------------------|-------|-------|------------------------|------------|------------|---|
| Deliberation           | Young | Large | Baseline               | 1.301      | 0.147      | 8 |
|                        |       |       | Inactivation           | 1.360      | 0.161      | 8 |
|                        |       | Small | Baseline               | 1.194      | 0.121      | 8 |
|                        |       |       | Inactivation           | 1.364      | 0.218      | 8 |
|                        | Aged  | Large | Baseline               | 0.953      | 0.158      | 7 |
|                        |       |       | Inactivation           | 1.059      | 0.173      | 7 |
|                        |       | Small | Baseline               | 0.980      | 0.129      | 7 |
|                        |       |       | Inactivation           | 1.065      | 0.234      | 7 |
| Small reward Outcome   | Young | Large | Baseline               | 1.498      | 0.203      | 6 |
|                        |       |       | Inactivation           | 1.354      | 0.177      | 6 |
|                        |       | Small | Baseline               | 1.112      | 0.123      | 6 |
|                        |       |       | Inactivation           | 1.036      | 0.070      | 6 |
|                        | Aged  | Large | Baseline               | 1.206      | 0.203      | 6 |
|                        |       |       | Inactivation           | 0.970      | 0.177      | 6 |
|                        |       | Small | Baseline               | 0.949      | 0.123      | 6 |
|                        |       |       | Inactivation           | 0.898      | 0.070      | 6 |

637

638

639

640

## References

641  
642

Antonenko D, Flöel A (2014) Healthy Aging by Staying Selectively Connected: A Mini-Review. *Gerontology* 60:3–9.

643  
644

Bailey MR, Simpson EH, Balsam PD (2016) Neural substrates underlying effort, time, and risk-based decision making in motivated behavior. *Neurobiol Learn Mem* 133:233–256.

645  
646  
647

Baxter MG, Parker A, Lindner CCC, Izquierdo AD, Murray EA (2000) Control of Response Selection by Reinforcer Value Requires Interaction of Amygdala and Orbital Prefrontal Cortex. *J Neurosci* 20:4311–4319.

648  
649

Beas BS, Setlow B, Gregory R, Samanez-Larkin, Bizon JL (2015) Modeling Cost-Benefit Decision Making in Aged Rodents. In: *Aging and Decision Making: Empirical and Applied Perspectives*, pp 16–40. Elsevier.

650  
651

Belova MA, Paton JJ, Morrison SE, Salzman CD (2007) Expectation Modulates Neural Responses to Pleasant and Aversive Stimuli in Primate Amygdala. *Neuron* 55:970–984.

652  
653

Belova MA, Paton JJ, Salzman CD (2008) Moment-to-moment tracking of state value in the amygdala. *J Neurosci Off J Soc Neurosci* 28:10023–10030.

654  
655  
656

Bercovici DA, Princz-Lebel O, Tse MT, Moorman DE, Floresco SB (2018) Optogenetic Dissection of Temporal Dynamics of Amygdala-Striatal Interplay during Risk/Reward Decision Making. *eNeuro* 5:ENEURO.0422-18.2018.

657  
658  
659

Beyeler A, Namburi P, Glober GF, Simonnet C, Calhoun GG, Conyers GF, Luck R, Wildes CP, Tye KM (2016) Divergent Routing of Positive and Negative Information from the Amygdala during Memory Retrieval. *Neuron* 90:348–361.

660  
661

Bickel WK, Koffarnus MN, Moody L, Wilson AG (2014) The behavioral- and neuro-economic process of temporal discounting: A candidate behavioral marker of addiction. *Neuropharmacology* 76:518–527.

662  
663  
664

Boyle PA, Yu L, Wilson RS, Gamble K, Buchman AS, Bennett DA (2012) Poor Decision Making Is a Consequence of Cognitive Decline among Older Persons without Alzheimer’s Disease or Mild Cognitive Impairment. *PLOS ONE* 7:e43647.

665  
666  
667  
668

Burgos-Robles A, Kimchi EY, Izadmehr EM, Porzenheim MJ, Ramos-Guasp WA, Nieh EH, Felix-Ortiz AC, Namburi P, Leppla CA, Presbrey KN, Anandalingam KK, Pagan-Rivera PA, Anahtar M, Beyeler A, Tye KM (2017) Amygdala inputs to prefrontal cortex guide behavior amid conflicting cues of reward and punishment. *Nat Neurosci* 20:824–835.

669  
670  
671

Burke SN, Thome A, Plange K, Engle JR, Trouard TP, Gothard KM, Barnes CA (2014) Orbitofrontal Cortex Volume in Area 11/13 Predicts Reward Devaluation, But Not Reversal Learning Performance, in Young and Aged Monkeys. *J Neurosci* 34:9905–9916.

672  
673

Churchwell JC, Morris AM, Heurtelou NM, Kesner RP (2009) Interactions between the prefrontal cortex and amygdala during delay discounting and reversal. *Behav Neurosci* 123:1185–1196.

674  
675  
676

Crowley TJ, Dalwani MS, Sakai JT, Raymond KM, McWilliams SK, Banich MT, Mikulich-Gilbertson SK (2017) Children’s brain activation during risky decision-making: A contributor to substance problems? *Drug Alcohol Depend* 178:57–65.

677  
678

Decker JH, Figner B, Steinglass JE (2015) On Weight and Waiting: Delay Discounting in Anorexia Nervosa Pretreatment and Posttreatment. *Biol Psychiatry* 78:606–614.

- 679 Denburg NL, Cole CA, Hernandez M, Yamada TH, Tranel D, Bechara A, Wallace RB (2007) The Orbitofrontal  
680 Cortex, Real-World Decision Making, and Normal Aging. *Ann N Y Acad Sci* 1121:480–498.
- 681 Dilgen J, Tejada HA, O'Donnell P (2013) Amygdala inputs drive feedforward inhibition in the medial prefrontal  
682 cortex. *J Neurophysiol* 110:221–229.
- 683 Eppinger B, Nystrom LE, Cohen JD (2012) Reduced sensitivity to immediate reward during decision-making in  
684 older than younger adults. *PLoS One* 7:e36953.
- 685 Eppinger B, Schuck NW, Nystrom LE, Cohen JD (2013) Reduced striatal responses to reward prediction errors  
686 in older compared with younger adults. *J Neurosci Off J Soc Neurosci* 33:9905–9912.
- 687 Eppinger B, Heekeren HR, Li SC (2015) Age-related prefrontal impairments implicate deficient prediction of  
688 future reward in older adults. *Neurobiol Aging* 36:2380–2390.
- 689 Evenden JL, Ryan CN (1996) The pharmacology of impulsive behaviour in rats: the effects of drugs on response  
690 choice with varying delays of reinforcement. *Psychopharmacology (Berl)* 128:161–170.
- 691 Everitt BJ, Cardinal RN, Parkinson JA, Robbins TW (2003) Appetitive behavior: impact of amygdala-dependent  
692 mechanisms of emotional learning. *Ann N Y Acad Sci* 985:233–250.
- 693 Fobbs WC, Mizumori SJY (2017) A framework for understanding and advancing intertemporal choice research  
694 using rodent models. *Neurobiol Learn Mem* 139:89–97.
- 695 Ghods-Sharifi S, St Onge JR, Floresco SB (2009) Fundamental contribution by the basolateral amygdala to  
696 different forms of decision making. *J Neurosci Off J Soc Neurosci* 29:5251–5259.
- 697 Grabenhorst F, Hernádi I, Schultz W (2012) Prediction of economic choice by primate amygdala neurons. *Proc*  
698 *Natl Acad Sci*:201212706.
- 699 Green L, Fry AF, Myerson J (1994) Discounting of Delayed Rewards: A Life-Span Comparison. *Psychol Sci*  
700 5:33–36.
- 701 Green L, Myerson J, Lichtman D, Rosen S, Fry A (1996) Temporal discounting in choice between delayed  
702 rewards: the role of age and income. *Psychol Aging* 11:79–84.
- 703 Green L, Myerson J, Ostraszewski P (1999) Discounting of delayed rewards across the life span: age differences  
704 in individual discounting functions. *Behav Processes* 46:89–96.
- 705 Hamilton KR et al. (2015) Choice Impulsivity: Definitions, Measurement Issues, and Clinical Implications.  
706 *Personal Disord* 6:182–198.
- 707 Hart EE, Izquierdo A (2017) Basolateral amygdala supports the maintenance of value and effortful choice of a  
708 preferred option. *Eur J Neurosci* 45:388–397.
- 709 Hatfield T, Han J-S, Conley M, Gallagher M, Holland P (1996) Neurotoxic Lesions of Basolateral, But Not Central,  
710 Amygdala Interfere with Pavlovian Second-Order Conditioning and Reinforcer Devaluation Effects. *J*  
711 *Neurosci* 16:5256–5265.
- 712 Hernandez CM, Vetere LM, Orsini CA, McQuail JA, Maurer AP, Burke SN, Setlow B, Bizon JL (2017) Decline of  
713 prefrontal cortical-mediated executive functions but attenuated delay discounting in aged Fischer 344 x  
714 brown Norway hybrid rats. *Neurobiol Aging* 60:141–152.
- 715 Hess TM, Strough J, Lockenhoff CE (2015) "Aging and decision making; empirical and applied perspectives."  
716 Academic Press, San Diego, CA. 399 pages.

- 717 Izquierdo A, Darling C, Manos N, Pozos H, Kim C, Ostrander S, Cazares V, Stepp H, Rudebeck PH (2013)  
718 Basolateral Amygdala Lesions Facilitate Reward Choices after Negative Feedback in Rats. *J Neurosci*  
719 33:4105–4109.
- 720 Jimura K, Myerson J, Hilgard J, Keighley J, Braver TS, Green L (2011) Domain independence and stability in  
721 young and older adults' discounting of delayed rewards. *Behav Processes* 87:253–259.
- 722 Johansen JP, Wolff SBE, Lüthi A, LeDoux JE (2012) Controlling the Elements: An Optogenetic Approach to  
723 Understanding the Neural Circuits of Fear. *Biol Psychiatry* 71:1053–1060.
- 724 Kaye WH, Wierenga CE, Bailer UF, Simmons AN, Bischoff-Grethe A (2013) Nothing tastes as good as skinny  
725 feels: the neurobiology of anorexia nervosa. *Trends Neurosci* 36:110–120.
- 726 Kim CK, Ye L, Jennings JH, Pichamoorthy N, Tang DD, Yoo A-CW, Ramakrishnan C, Deisseroth K (2017)  
727 Molecular and Circuit-Dynamical Identification of Top-Down Neural Mechanisms for Restraint of Reward  
728 Seeking. *Cell* 170:1013-1027.e14.
- 729 Lighthall NR, Huettel SA, Cabeza R (2014) Functional Compensation in the Ventromedial Prefrontal Cortex  
730 Improves Memory-Dependent Decisions in Older Adults. *J Neurosci* 34:15648–15657.
- 731 Löckenhoff CE, O'Donoghue T, Dunning D (2011) Age differences in temporal discounting: the role of  
732 dispositional affect and anticipated emotions. *Psychol Aging* 26:274–284.
- 733 Lolova I, Davidoff M (1991) Changes in GABA-immunoreactivity and GABA-transaminase activity in rat  
734 amygdaloid complex in aging. *J Hirnforsch* 32:231–238.
- 735 Málková L, Gaffan D, Murray EA (1997) Excitotoxic Lesions of the Amygdala Fail to Produce Impairment in  
736 Visual Learning for Auditory Secondary Reinforcement But Interfere with Reinforcer Devaluation Effects  
737 in Rhesus Monkeys. *J Neurosci* 17:6011–6020.
- 738 Mata R, Josef AK, Samanez-Larkin GR, Hertwig R (2011) Age differences in risky choice: a meta-analysis. *Ann*  
739 *N Y Acad Sci* 1235:18–29.
- 740 Mather M, Mazar N, Gorlick MA, Lighthall NR, Burgeno J, Schoeke A, Ariely D (2012) Risk preferences and  
741 aging: the “certainty effect” in older adults' decision making. *Psychol Aging* 27:801–816.
- 742 Orsini CA, Hernandez CM, Singhal S, Kelly KB, Frazier CJ, Bizon JL, Setlow B (2017) Optogenetic Inhibition  
743 Reveals Distinct Roles for Basolateral Amygdala Activity at Discrete Time Points during Risky Decision  
744 Making. *J Neurosci* 37:11537–11548.
- 745 Orsini CA, Moorman DE, Young JW, Setlow B, Floresco SB (2015a) Neural mechanisms regulating different  
746 forms of risk-related decision-making: Insights from animal models. *Neurosci Biobehav Rev* 58:147–167.
- 747 Orsini CA, Trotta RT, Bizon JL, Setlow B (2015b) Dissociable roles for the basolateral amygdala and orbitofrontal  
748 cortex in decision-making under risk of punishment. *J Neurosci Off J Soc Neurosci* 35:1368–1379.
- 749 Pachur T, Mata R, Hertwig R (2017) Who Dares, Who Errs? Disentangling Cognitive and Motivational Roots of  
750 Age Differences in Decisions Under Risk. *Psychol Sci* 28:504–518.
- 751 Parkes SL, Balleine BW (2013) Incentive Memory: Evidence the Basolateral Amygdala Encodes and the Insular  
752 Cortex Retrieves Outcome Values to Guide Choice between Goal-Directed Actions. *J Neurosci* 33:8753–  
753 8763.



- 754 Patros CHG, Alderson RM, Kasper LJ, Tarle SJ, Lea SE, Hudec KL (2016) Choice-impulsivity in children and  
755 adolescents with attention-deficit/hyperactivity disorder (ADHD): A meta-analytic review. *Clin Psychol*  
756 *Rev* 43:162–174.
- 757 Paxinos G, Watson C (2005) *The rat brain in stereotaxic coordinates*. New York: Elsevier Academic.
- 758 Pérez-Jaranay JM, Vives F (1991) Electrophysiological study of the response of medial prefrontal cortex neurons  
759 to stimulation of the basolateral nucleus of the amygdala in the rat. *Brain Res* 564:97–101.
- 760 Peters J, Büchel C (2011) The neural mechanisms of inter-temporal decision-making: understanding variability.  
761 *Trends Cogn Sci* 15:227–239.
- 762 Prager EM, Bergstrom HC, Wynn GH, Braga MFM (2016) The basolateral amygdala  $\gamma$ -aminobutyric acidergic  
763 system in health and disease. *J Neurosci Res* 94:548–567.
- 764 Rangel A, Camerer C, Montague PR (2008) A framework for studying the neurobiology of value-based decision  
765 making. *Nat Rev Neurosci* 9:545–556.
- 766 Roesch MR, Esber GR, Bryden DW, Cerri DH, Haney ZR, Schoenbaum G (2012) Normal aging alters learning  
767 and attention-related teaching signals in basolateral amygdala. *J Neurosci Off J Soc Neurosci* 32:13137–  
768 13144.
- 769 Rubinow MJ, Drogos LL, Juraska JM (2009) Age-related dendritic hypertrophy and sexual dimorphism in rat  
770 basolateral amygdala. *Neurobiol Aging* 30:137–146.
- 771 Rubinow MJ, Juraska JM (2009) Neuron and glia numbers in the basolateral nucleus of the amygdala from  
772 preweaning through old age in male and female rats: A stereological study. *J Comp Neurol* 512:717–  
773 725.
- 774 Sah P, Faber ESL, Armentia MLD, Power J (2003) *The Amygdaloid Complex: Anatomy and Physiology*. *Physiol*  
775 *Rev* 83:803–834.
- 776 Samanez-Larkin GR, Knutson B (2015) Decision making in the ageing brain: changes in affective and  
777 motivational circuits. *Nat Rev Neurosci* 16:278–289.
- 778 Samanez-Larkin GR, Mata R, Radu PT, Ballard IC, Carstensen LL, McClure SM (2011) Age Differences in  
779 Striatal Delay Sensitivity during Intertemporal Choice in Healthy Adults. *Front Neurosci* 5:126.
- 780 Samson RD, Lester AW, Duarte L, Venkatesh A, Barnes CA (2017) Emergence of  $\beta$ -Band Oscillations in the  
781 Aged Rat Amygdala during Discrimination Learning and Decision Making Tasks. *eNeuro* 4.
- 782 Sangha S, Chadick JZ, Janak PH (2013) Safety Encoding in the Basal Amygdala. *J Neurosci* 33:3744–3751.
- 783 Schoenbaum G, Chiba AA, Gallagher M (1998) Orbitofrontal cortex and basolateral amygdala encode expected  
784 outcomes during learning. *Nat Neurosci* 1:155–159.
- 785 Schoenbaum G, Chiba AA, Gallagher M (1999) Neural Encoding in Orbitofrontal Cortex and Basolateral  
786 Amygdala during Olfactory Discrimination Learning. *J Neurosci* 19:1876–1884.
- 787 Schoenbaum G, Setlow B, Saddoris MP, Gallagher M (2006) Encoding changes in orbitofrontal cortex in  
788 reversal-impaired rats. *J Neurophysiol* 95: 1509-1517.
- 789 Shiflett MW, Balleine BW (2010) At the limbic–motor interface: disconnection of basolateral amygdala from  
790 nucleus accumbens core and shell reveals dissociable components of incentive motivation. *Eur J*  
791 *Neurosci* 32:1735–1743.



- 792 Simon NW, LaSarge CL, Montgomery KS, Williams MT, Mendez IA, Setlow B, Bizon JL (2010) Good things  
793 come to those who wait: attenuated discounting of delayed rewards in aged Fischer 344 rats. *Neurobiol*  
794 *Aging* 31:853–862.
- 795 Sripada CS, Gonzalez R, Phan KL, Liberzon I (2011) The neural correlates of intertemporal decision-making:  
796 Contributions of subjective value, stimulus type, and trait impulsivity. *Hum Brain Mapp* 32:1637–1648.
- 797 St Onge JR, Floresco SB (2010) Prefrontal cortical contribution to risk-based decision making. *Cereb Cortex N*  
798 *Y N* 1991 20:1816–1828.
- 799 Steinglass JE, Figner B, Berkowitz S, Simpson HB, Weber EU, Walsh BT (2012) Increased Capacity to Delay  
800 Reward in Anorexia Nervosa. *J Int Neuropsychol Soc* 18:773–780.
- 801 Tomas-Pereira I, Gallagher M, Rapp PR (2015) Head west or left, east or right: interactions between memory  
802 systems in neurocognitive aging. *Neurobiol Aging* 36:3067-3078.
- 803 Wang W-C, Dew ITZ, Cabeza R (2015) Age-related differences in medial temporal lobe involvement during  
804 conceptual fluency. *Brain Res* 1612:48–58.
- 805 Wassum KM, Izquierdo A (2015) The basolateral amygdala in reward learning and addiction. *Neurosci Biobehav*  
806 *Rev* 57:271–283.
- 807 Winstanley CA, Theobald DEH, Cardinal RN, Robbins TW (2004) Contrasting roles of basolateral amygdala and  
808 orbitofrontal cortex in impulsive choice. *J Neurosci Off J Soc Neurosci* 24:4718–4722.
- 809 Zangemeister L, Grabenhorst F, Schultz W (2016) Neural Basis for Economic Saving Strategies in Human  
810 Amygdala-Prefrontal Reward Circuits. *Curr Biol* 26:3004–3013.
- 811 Zhang W, Schneider DM, Belova MA, Morrison SE, Paton JJ, Salzman CD (2013) Functional Circuits and  
812 Anatomical Distribution of Response Properties in the Primate Amygdala. *J Neurosci* 33:722–733.
- 813 Zuo Y, Wang X, Cui C, Luo F, Yu P, Wang X (2011) Cocaine-induced Impulsive Choices Are Accompanied by  
814 Impaired Delay-dependent Anticipatory Activity in Basolateral Amygdala. *J Cogn Neurosci* 24:196–211.
- 815
- 816

817  
818  
819  
820  
821  
822  
823  
824  
825  
826  
827  
828  
829  
830  
831  
832  
833  
834  
835  
836  
837  
838  
839  
840  
841  
842

843

## Figure 1

### A. Intertemporal choice task schematic      B. Timing of light delivery on each trial for distinct epochs

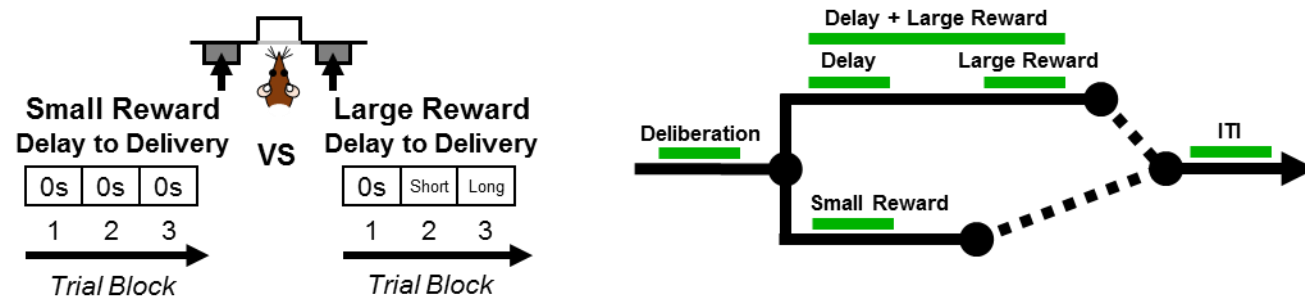

844

845

846

847

848

849

850

851 **Figure 2**

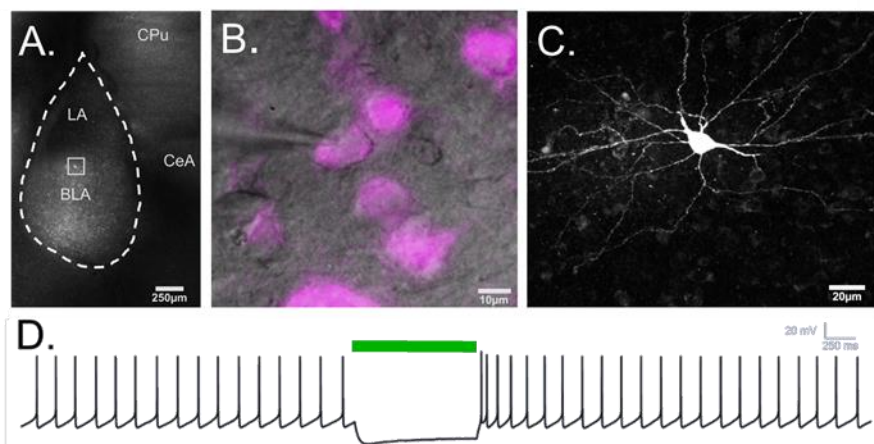

852

853

854

855

856

857

858

859

860 **Figure 3**

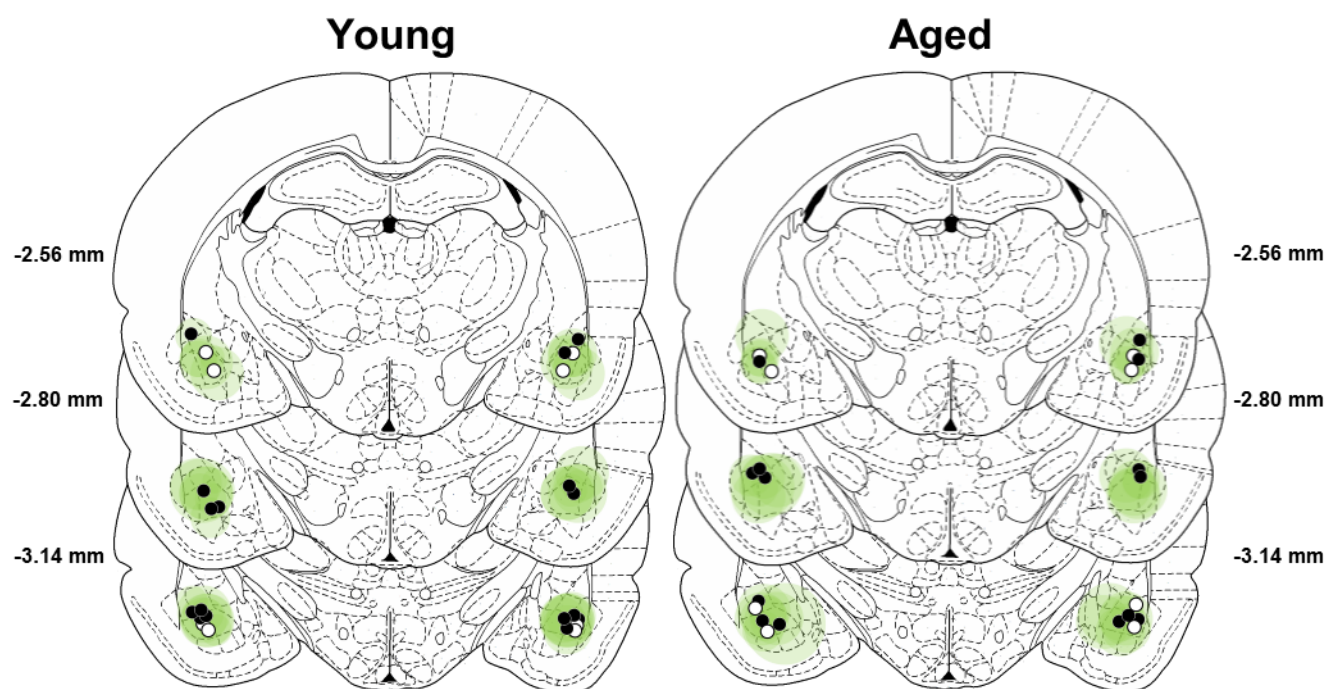

861

862

863

864

865 **Figure 4**

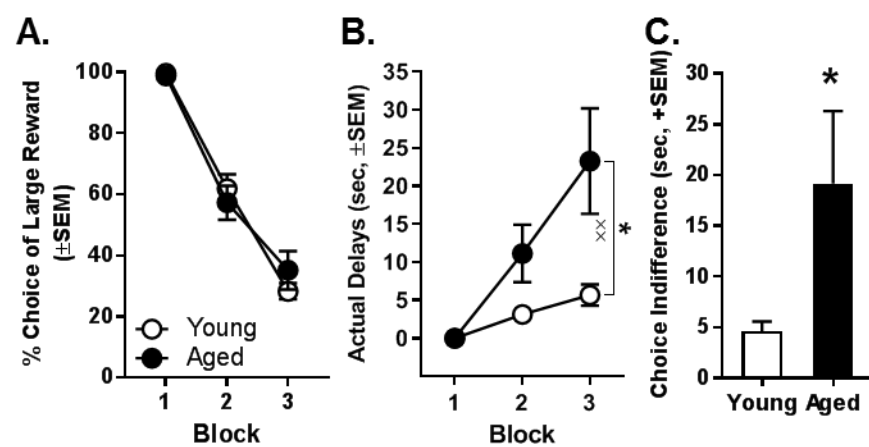

866

867

868

869

870

871

872 **Figure 5**

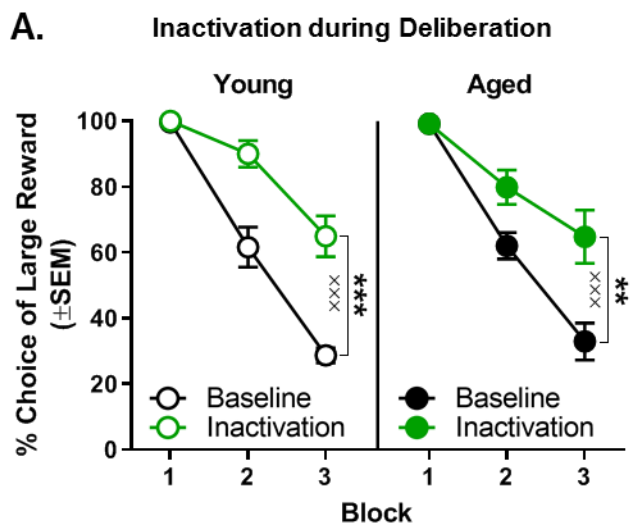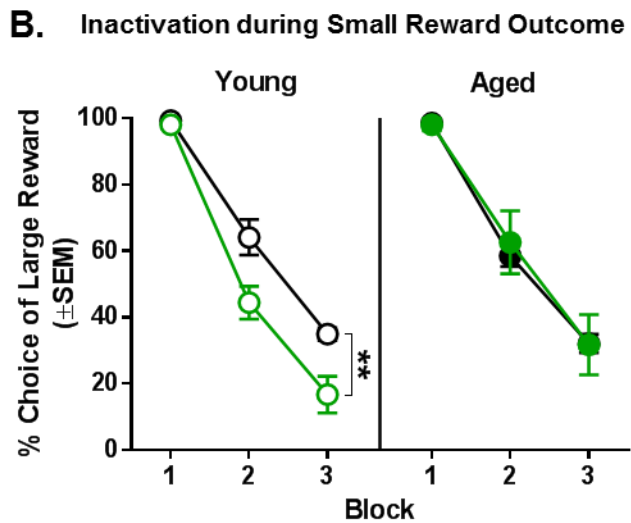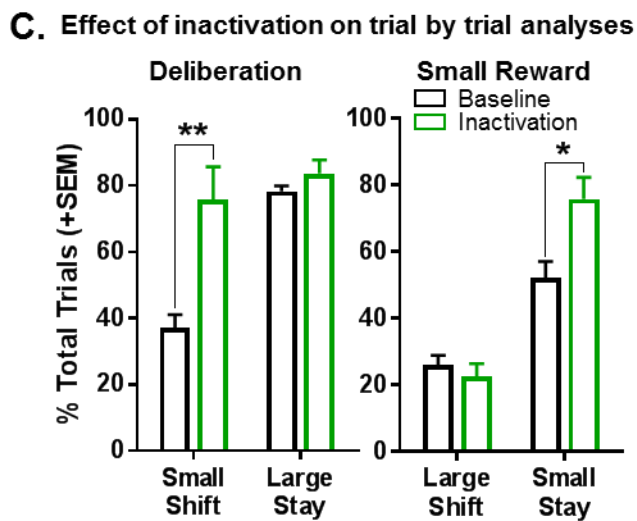

873

874

875

876 **Figure 6**

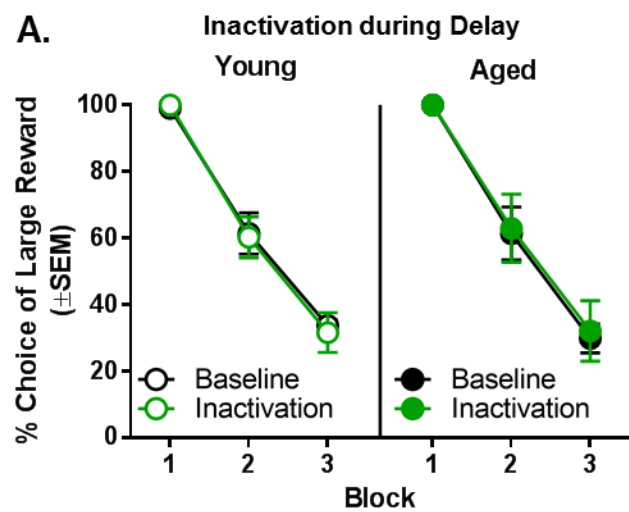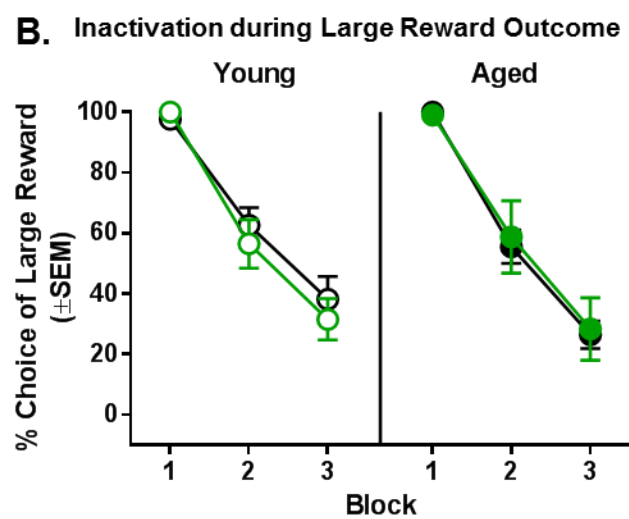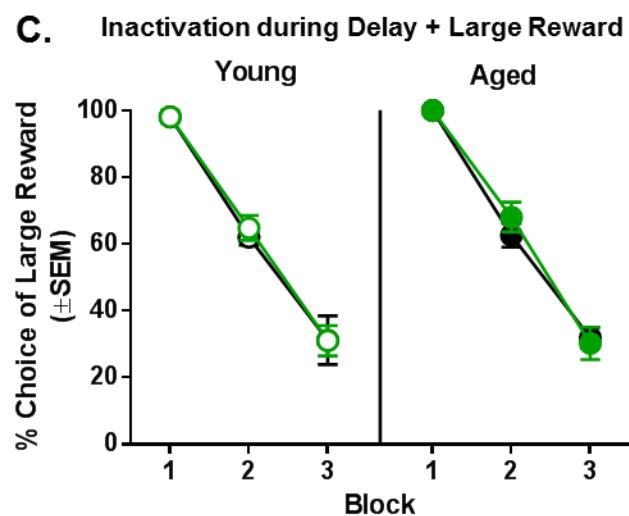

877

878

879

880

881 **Figure 7**

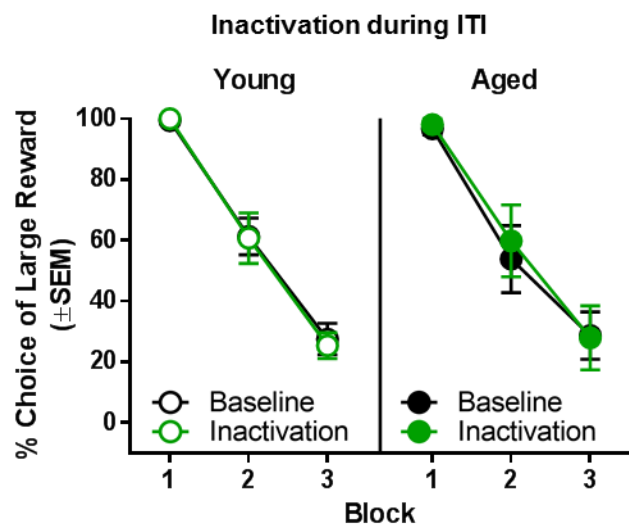

882

883

884

885

886

887

888 **Figure 8**

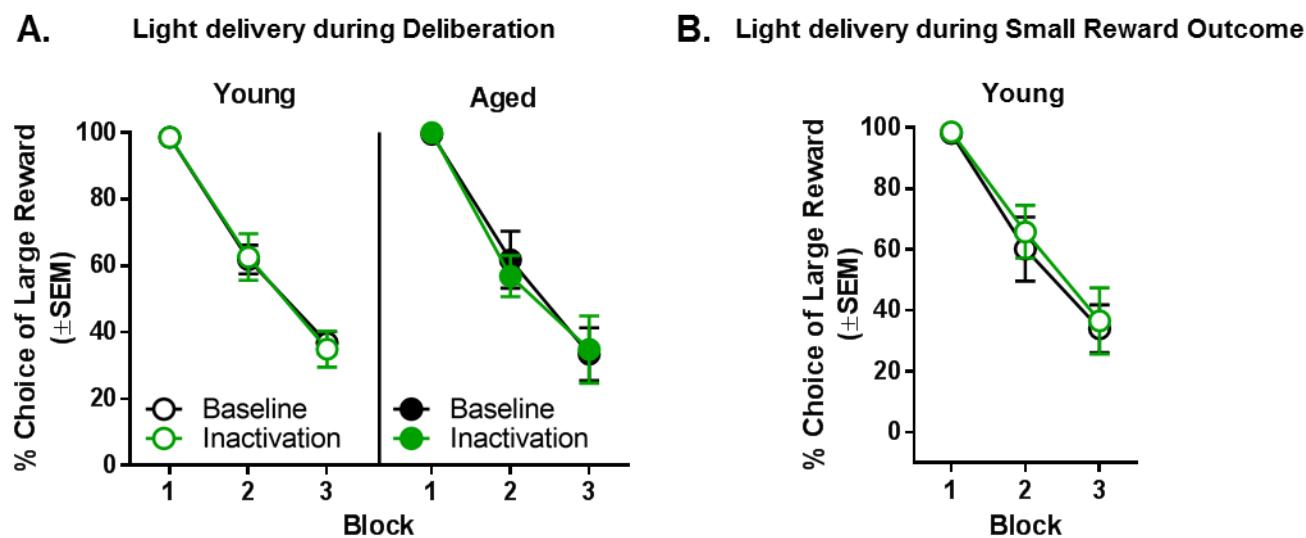

889
